# Supplementary material for: Machine learning for early discrimination between transient and persistent acute kidney injury in critically ill patients with sepsis
Source: PubMed Central journal article supplement (PMC8511088; doi:10.1038/s41598-021-99840-6), 2021-10-12
Supplement: 41598_2021_99840_MOESM1_ESM.pdf [file 41598_2021_99840_MOESM1_ESM.pdf]

**Machine learning for early discrimination between transient and persistent acute kidney injury  
in critically ill patients with sepsis**

Xiao-Qin Luo<sup>1</sup>, Ping Yan<sup>1</sup>, Ning-Ya Zhang<sup>2</sup>, Bei Luo<sup>3</sup>, Mei Wang<sup>1</sup>, Ying-Hao Deng<sup>1</sup>, Ting Wu<sup>1</sup>, Xi Wu<sup>1</sup>,  
Qian Liu<sup>1</sup>, Hong-Shen Wang<sup>1</sup>, Lin Wang<sup>1</sup>, Yi-Xin Kang<sup>1</sup> & Shao-Bin Duan<sup>1\*</sup>

<sup>1</sup>Department of Nephrology, The Second Xiangya Hospital of Central South University, Hunan Key  
Laboratory of Kidney Disease and Blood Purification, Changsha 410011, Hunan, China

<sup>2</sup>Information Center, The Second Xiangya Hospital of Central South University, Changsha 410011,  
Hunan, China

<sup>3</sup>Department of Information Systems, City University of Hong Kong; Tat Chee Avenue, Kowloon Hong  
Kong SAR 999077, China

**\*Corresponding author:** Professor Shao-Bin Duan, The Second Xiangya Hospital of Central South  
University, 139 Renmin Road, Changsha 410011, Hunan, China. E-mail: [duansb528@csu.edu.cn](mailto:duansb528@csu.edu.cn)

**Table S1.** Missing data of baseline characteristics.

| Variables                            | Missing data, n (%) |
|--------------------------------------|---------------------|
| Age (year)                           | 0 (0.0)             |
| Sex, male                            | 0 (0.0)             |
| Ethnicity                            | 0 (0.0)             |
| ICU type                             | 0 (0.0)             |
| Admission type                       | 0 (0.0)             |
| Comorbidities                        |                     |
| Hypertension                         | 0 (0.0)             |
| Diabetes mellitus                    | 0 (0.0)             |
| Congestive heart failure             | 0 (0.0)             |
| Peripheral vascular disease          | 0 (0.0)             |
| Chronic pulmonary disease            | 0 (0.0)             |
| Liver disease                        | 0 (0.0)             |
| AIDS                                 | 0 (0.0)             |
| Metastatic cancer                    | 0 (0.0)             |
| Chronic kidney disease               | 0 (0.0)             |
| Vital signs                          |                     |
| Minimum temperature (°C)             | 149 (2.5)           |
| Maximum temperature (°C)             | 149 (2.5)           |
| Maximum heart rate (bpm)             | 9 (0.2)             |
| Maximum respiratory rate (bpm)       | 9 (0.2)             |
| Minimum MAP (mmHg)                   | 9 (0.2)             |
| Laboratory data                      |                     |
| Minimum hemoglobin (g/dL)            | 4 (0.07)            |
| Minimum WBC ( $\times 10^9/L$ )      | 3 (0.05)            |
| Maximum WBC ( $\times 10^9/L$ )      | 3 (0.05)            |
| Minimum platelet ( $\times 10^9/L$ ) | 3 (0.05)            |
| Maximum bilirubin (mg/dL)            | 2552 (42.6)         |
| Minimum albumin (g/dL)               | 3150 (52.6)         |
| Minimum pH                           | 824 (13.8)          |
| Minimum PaO <sub>2</sub> (mmHg)      | 824 (13.8)          |
| Minimum PaCO <sub>2</sub> (mmHg)     | 824 (13.8)          |
| Maximum PaCO <sub>2</sub> (mmHg)     | 824 (13.8)          |
| Maximum anion gap (mmol/L)           | 13 (0.2)            |
| Minimum sodium (mmol/L)              | 2 (0.03)            |
| Maximum sodium (mmol/L)              | 2 (0.03)            |
| Maximum potassium (mmol/L)           | 2 (0.03)            |
| Minimum chloride (mmol/L)            | 2 (0.03)            |
| Maximum chloride (mmol/L)            | 2 (0.03)            |
| Minimum bicarbonate (mmol/L)         | 2 (0.03)            |
| Maximum lactate (mmol/L)             | 1309 (21.9)         |
| Maximum INR                          | 408 (6.8)           |
| Maximum PTT (sec)                    | 428 (7.2)           |
| Interventions                        |                     |
| Mechanical ventilation               | 0 (0.0)             |
| Vasopressors                         | 0 (0.0)             |
| Diuretics                            | 0 (0.0)             |
| RRT initiation                       | 0 (0.0)             |

|                           |          |
|---------------------------|----------|
| Daily fluid infusion (mL) | 76 (1.3) |
| AKI stage by SCr criteria | 0 (0.0)  |
| AKI stage by UO criteria  | 0 (0.0)  |

---

ICU, intensive care unit; AIDS, acquired immune deficiency syndrome; MAP, mean arterial pressure; WBC, white blood cell; PaO<sub>2</sub>, partial pressure of oxygen; PaCO<sub>2</sub>, partial pressure of carbon dioxide; INR, international normalized ratio; PTT, partial thromboplastin time; RRT, renal replacement therapy; AKI, acute kidney injury; SCr, serum creatinine; UO, urine output.

**Table S2.** List of variables included in the machine learning models.

| Variable                    | Type        | Unit            |
|-----------------------------|-------------|-----------------|
| Age                         | Continuous  | year            |
| Sex                         | Categorical | -               |
| Ethnicity                   | Categorical | -               |
| ICU type                    | Categorical | -               |
| Admission type              | Categorical | -               |
| Hypertension                | Categorical | -               |
| Diabetes mellitus           | Categorical | -               |
| Congestive heart failure    | Categorical | -               |
| Peripheral vascular disease | Categorical | -               |
| Chronic pulmonary disease   | Categorical | -               |
| Liver disease               | Categorical | -               |
| AIDS                        | Categorical | -               |
| Metastatic cancer           | Categorical | -               |
| Chronic kidney disease      | Categorical | -               |
| Minimum temperature         | Continuous  | °C              |
| Maximum temperature         | Continuous  | °C              |
| Maximum heart rate          | Continuous  | bpm             |
| Maximum respiratory rate    | Continuous  | bpm             |
| Minimum MAP                 | Continuous  | mmHg            |
| Minimum hemoglobin          | Continuous  | g/dL            |
| Minimum WBC                 | Continuous  | $\times 10^9/L$ |
| Maximum WBC                 | Continuous  | $\times 10^9/L$ |
| Minimum platelet            | Continuous  | $\times 10^9/L$ |
| Minimum pH                  | Continuous  | -               |
| Minimum PaO <sub>2</sub>    | Continuous  | mmHg            |
| Minimum PaCO <sub>2</sub>   | Continuous  | mmHg            |
| Maximum PaCO <sub>2</sub>   | Continuous  | mmHg            |
| Maximum anion gap           | Continuous  | mmol/L          |
| Minimum sodium              | Continuous  | mmol/L          |
| Maximum sodium              | Continuous  | mmol/L          |
| Maximum potassium           | Continuous  | mmol/L          |
| Minimum chloride            | Continuous  | mmol/L          |
| Maximum chloride            | Continuous  | mmol/L          |
| Minimum bicarbonate         | Continuous  | mmol/L          |
| Maximum lactate             | Continuous  | mmol/L          |
| Maximum INR                 | Continuous  | -               |
| Maximum PTT                 | Continuous  | sec             |
| Mechanical ventilation      | Categorical | -               |
| Vasopressors                | Categorical | -               |
| RRT initiation              | Categorical | -               |
| Diuretics                   | Categorical | -               |
| Daily fluid infusion        | Continuous  | mL              |
| AKI stage by SCr criteria   | Categorical | -               |
| AKI stage by UO criteria    | Categorical | -               |

ICU, intensive care unit; AIDS, acquired immune deficiency syndrome; MAP, mean arterial pressure;

WBC, white blood cell; PaO<sub>2</sub>, partial pressure of oxygen; PaCO<sub>2</sub>, partial pressure of carbon dioxide; INR,

international normalized ratio; PTT, partial thromboplastin time; RRT, renal replacement therapy; AKI, acute kidney injury; SCr, serum creatinine; UO, urine output.

**Table S3.** Locations of culture-positive specimens in patients stratified by the persistence of AKI.

| Specimen                                               | Transient AKI<br>(n=2179) | Persistent AKI<br>(n=3805) | <i>P</i> value |
|--------------------------------------------------------|---------------------------|----------------------------|----------------|
| Sputum, n (%)                                          | 248 (11.4)                | 504 (13.2)                 | 0.040          |
| Urine, n (%)                                           | 255 (11.7)                | 500 (13.1)                 | 0.12           |
| Blood, n (%)                                           | 205 (9.4)                 | 394 (10.4)                 | 0.26           |
| Bronchoalveolar lavage or<br>bronchial washings, n (%) | 48 (2.2)                  | 87 (2.3)                   | 0.91           |
| Tissue, n (%)                                          | 30 (1.4)                  | 66 (1.7)                   | 0.34           |
| Abscess, n (%)                                         | 11 (0.5)                  | 15 (0.4)                   | 0.67           |
| Stool, n (%)                                           | 17 (0.8)                  | 34 (0.9)                   | 0.75           |
| Peritoneal fluid, n (%)                                | 7 (0.3)                   | 33 (0.9)                   | 0.02           |
| Pleural fluid, n (%)                                   | 6 (0.3)                   | 19 (0.5)                   | 0.28           |
| Bile, n (%)                                            | 13 (0.6)                  | 13 (0.3)                   | 0.22           |
| Other, n (%)                                           | 209 (9.6)                 | 394 (10.4)                 | 0.37           |

AKI, acute kidney injury.

**Table S4.** Pathogenic microorganisms in patients stratified by the persistence of AKI.

| Pathogens                     | Transient AKI<br>(n=2179) | Persistent AKI<br>(n=3805) | <i>P</i> value |
|-------------------------------|---------------------------|----------------------------|----------------|
| Gram-positive bacteria, n (%) |                           |                            |                |
| Staphylococcus                | 314 (14.4)                | 614 (16.1)                 | 0.08           |
| Enterococcus                  | 78 (3.6)                  | 184 (4.8)                  | 0.026          |
| Streptococcus                 | 93 (4.3)                  | 168 (4.4)                  | 0.84           |
| Corynebacterium               | 22 (1.0)                  | 48 (1.3)                   | 0.46           |
| Clostridium                   | 25 (1.2)                  | 44 (1.2)                   | 1.00           |
| Lactobacillus                 | 6 (0.3)                   | 14 (0.4)                   | 0.72           |
| Other                         | 50 (2.3)                  | 101 (2.7)                  | 0.44           |
| Gram-negative bacteria, n (%) |                           |                            |                |
| Escherichia coli              | 117 (5.4)                 | 201 (5.3)                  | 0.93           |
| Pseudomonas aeruginosa        | 43 (2.0)                  | 81 (2.1)                   | 0.76           |
| Klebsiella                    | 52 (2.4)                  | 103 (2.7)                  | 0.51           |
| Proteus                       | 28 (1.3)                  | 35 (0.9)                   | 0.23           |
| Enterobacter                  | 11 (0.5)                  | 22 (0.6)                   | 0.85           |
| Serratia                      | 9 (0.4)                   | 13 (0.3)                   | 0.83           |
| Haemophilus                   | 19 (0.9)                  | 26 (0.7)                   | 0.51           |
| Bacteroides fragilis          | 18 (0.8)                  | 41 (1.1)                   | 0.42           |
| Stenotrophomonas maltophilia  | 3 (0.1)                   | 10 (0.3)                   | 0.40           |
| Acinetobacter                 | 8 (0.4)                   | 7 (0.2)                    | 0.27           |
| Other                         | 91 (4.2)                  | 194 (5.1)                  | 0.12           |
| Fungi, n (%)                  |                           |                            |                |
| Yeast                         | 149 (6.8)                 | 369 (9.7)                  | <0.001         |
| Candida                       | 26 (1.2)                  | 53 (1.4)                   | 0.59           |
| Aspergillus                   | 5 (0.2)                   | 17 (0.5)                   | 0.27           |
| Other                         | 16 (0.7)                  | 21 (0.6)                   | 0.49           |
| Virus, n (%)                  |                           |                            |                |
|                               | 8 (0.4)                   | 17 (0.5)                   | 0.80           |

AKI, acute kidney injury.

**Table S5.** The 20 most common diagnoses in SA-AKI patients.

| ICD-9 codes                                                  | Description                                                                                                | n (%)       |
|--------------------------------------------------------------|------------------------------------------------------------------------------------------------------------|-------------|
| The 20 most common diagnoses in patients with transient AKI  |                                                                                                            |             |
| 4019                                                         | Unspecified essential hypertension                                                                         | 1008 (46.3) |
| 42731                                                        | Atrial fibrillation                                                                                        | 661 (30.3)  |
| 4280                                                         | Congestive heart failure, unspecified                                                                      | 650 (29.8)  |
| 51881                                                        | Acute respiratory failure                                                                                  | 549 (25.2)  |
| 41401                                                        | Coronary atherosclerosis of native coronary artery                                                         | 535 (24.6)  |
| 5849                                                         | Acute kidney failure, unspecified                                                                          | 505 (23.2)  |
| 2724                                                         | Other and unspecified hyperlipidemia                                                                       | 493 (22.6)  |
| 25000                                                        | Diabetes mellitus without mention of complication, type II or unspecified type, not stated as uncontrolled | 393 (18.0)  |
| 5990                                                         | Urinary tract infection, site not specified                                                                | 369 (16.9)  |
| 2859                                                         | Anemia, unspecified                                                                                        | 323 (14.8)  |
| 99592                                                        | Severe sepsis                                                                                              | 318 (14.6)  |
| 486                                                          | Pneumonia, organism unspecified                                                                            | 294 (13.5)  |
| 53081                                                        | Esophageal reflux                                                                                          | 293 (13.4)  |
| 5070                                                         | Pneumonitis due to inhalation of food or vomitus                                                           | 291 (13.4)  |
| 0389                                                         | Unspecified septicemia                                                                                     | 282 (12.9)  |
| 2449                                                         | Unspecified acquired hypothyroidism                                                                        | 240 (11.0)  |
| 2851                                                         | Acute posthemorrhagic anemia                                                                               | 233 (10.7)  |
| 2720                                                         | Pure hypercholesterolemia                                                                                  | 218 (10.0)  |
| 2762                                                         | Acidosis                                                                                                   | 210 (9.6)   |
| 78552                                                        | Septic shock                                                                                               | 207 (9.5)   |
| The 20 most common diagnoses in patients with persistent AKI |                                                                                                            |             |
| 4019                                                         | Unspecified essential hypertension                                                                         | 1580 (41.5) |
| 51881                                                        | Acute respiratory failure                                                                                  | 1463 (38.4) |
| 42731                                                        | Atrial fibrillation                                                                                        | 1446 (38.0) |
| 4280                                                         | Congestive heart failure, unspecified                                                                      | 1438 (37.8) |
| 5849                                                         | Acute kidney failure, unspecified                                                                          | 1253 (32.9) |
| 41401                                                        | Coronary atherosclerosis of native coronary artery                                                         | 892 (23.4)  |
| 25000                                                        | Diabetes mellitus without mention of complication, type II or unspecified type, not stated as uncontrolled | 882 (23.2)  |
| 99592                                                        | Severe sepsis                                                                                              | 854 (22.4)  |
| 5845                                                         | Acute kidney failure with lesion of tubular necrosis                                                       | 727 (19.1)  |
| 2724                                                         | Other and unspecified hyperlipidemia                                                                       | 709 (18.6)  |
| 5990                                                         | Urinary tract infection, site not specified                                                                | 708 (18.6)  |
| 486                                                          | Pneumonia, organism unspecified                                                                            | 668 (17.6)  |
| 0389                                                         | Unspecified septicemia                                                                                     | 667 (17.5)  |
| 2762                                                         | Acidosis                                                                                                   | 665 (17.5)  |
| 5070                                                         | Pneumonitis due to inhalation of food or vomitus                                                           | 598 (15.7)  |
| 78552                                                        | Septic shock                                                                                               | 581 (15.3)  |
| 2859                                                         | Anemia, unspecified                                                                                        | 560 (14.7)  |
| 2875                                                         | Thrombocytopenia, unspecified                                                                              | 488 (12.8)  |
| 2851                                                         | Acute posthemorrhagic anemia                                                                               | 464 (12.2)  |
| 2760                                                         | Hyperosmolality and/or hypernatremia                                                                       | 428 (11.2)  |

SA-AKI, sepsis-associated acute kidney injury; AKI, acute kidney injury. ICD-9, International Classification of Diseases 9th Edition.

**Table S6.** Baseline characteristics of patients in the training and testing set.

| Variables                            | Training set<br>(n=4188) | Testing set<br>(n=1796) | <i>P</i> value |
|--------------------------------------|--------------------------|-------------------------|----------------|
| Age (year)                           | 69 (57-80)               | 69 (56-80)              | 0.20           |
| Sex, male, n (%)                     | 2339 (55.9)              | 1016 (56.6)             | 0.63           |
| Ethnicity, n (%)                     |                          |                         | 0.91           |
| White                                | 3129 (74.7)              | 1336 (74.4)             |                |
| Black                                | 302 (7.2)                | 135 (7.5)               |                |
| Other                                | 757 (18.1)               | 325 (18.1)              |                |
| ICU type, n (%)                      |                          |                         | 0.46           |
| MICU                                 | 1662 (39.7)              | 741 (41.3)              |                |
| SICU/TSICU                           | 1191 (28.4)              | 507 (28.2)              |                |
| CCU/CSRU                             | 1335 (31.9)              | 548 (30.5)              |                |
| Admission type, n (%)                |                          |                         | 0.53           |
| Elective                             | 595 (14.2)               | 266 (14.8)              |                |
| Emergency                            | 3504 (83.7)              | 1485 (82.7)             |                |
| Urgent                               | 89 (2.1)                 | 45 (2.5)                |                |
| Comorbidities, n (%)                 |                          |                         |                |
| Hypertension                         | 2303 (55.0)              | 994 (55.3)              | 0.82           |
| Diabetes mellitus                    | 1235 (29.5)              | 550 (30.6)              | 0.40           |
| Congestive heart failure             | 1596 (38.1)              | 653 (36.4)              | 0.21           |
| Peripheral vascular disease          | 575 (13.7)               | 242 (13.5)              | 0.82           |
| Chronic pulmonary disease            | 923 (22.0)               | 388 (21.6)              | 0.73           |
| Liver disease                        | 449 (10.7)               | 210 (11.7)              | 0.29           |
| AIDS                                 | 37 (0.9)                 | 20 (1.1)                | 0.49           |
| Metastatic cancer                    | 237 (5.7)                | 106 (5.9)               | 0.76           |
| Chronic kidney disease               | 563 (13.4)               | 242 (13.5)              | 1.00           |
| Vital signs                          |                          |                         |                |
| Minimum temperature (°C)             | 35.9 (35.5-36.4)         | 35.9 (35.6-36.4)        | 0.43           |
| Maximum temperature (°C)             | 37.8 (37.3-38.4)         | 37.8 (37.3-38.4)        | 0.71           |
| Maximum heart rate (bpm)             | 112 (98-128)             | 113 (99-129)            | 0.31           |
| Maximum respiratory rate (bpm)       | 30 (26-35)               | 30 (26-34)              | 0.22           |
| Minimum MAP (mmHg)                   | 53 (47-59)               | 53 (47-59)              | 0.56           |
| Laboratory data                      |                          |                         |                |
| Minimum hemoglobin (g/dL)            | 9.1 (8.1-10.4)           | 9.1 (8.1-10.3)          | 0.49           |
| Minimum WBC ( $\times 10^9/L$ )      | 9.6 (6.9-12.9)           | 9.7 (6.9-13.2)          | 0.57           |
| Maximum WBC ( $\times 10^9/L$ )      | 14.4 (10.6-19.3)         | 14.2 (10.5-19.2)        | 0.40           |
| Minimum platelet ( $\times 10^9/L$ ) | 152 (101-220)            | 153 (99-225)            | 0.56           |
| Minimum pH                           | 7.33 (7.26-7.38)         | 7.33 (7.26-7.38)        | 0.23           |
| Minimum PaO <sub>2</sub> (mmHg)      | 81 (67-100)              | 82 (67-101)             | 0.59           |
| Minimum PaCO <sub>2</sub> (mmHg)     | 34 (30-38)               | 34 (30-39)              | 0.41           |
| Maximum PaCO <sub>2</sub> (mmHg)     | 46 (40-53)               | 45 (40-53)              | 0.32           |
| Maximum anion gap (mmol/L)           | 15 (13-18)               | 15 (13-18)              | 0.58           |
| Minimum sodium (mmol/L)              | 136 (133-139)            | 136 (133-139)           | 0.66           |
| Maximum sodium (mmol/L)              | 141 (138-143)            | 140 (138-143)           | 0.63           |
| Maximum potassium (mmol/L)           | 4.6 (4.2-5.1)            | 4.6 (4.2-5.1)           | 0.06           |
| Minimum chloride (mmol/L)            | 103 (100-107)            | 103 (100-107)           | 0.73           |
| Maximum chloride (mmol/L)            | 109 (105-112)            | 109 (105-112)           | 0.35           |
| Minimum bicarbonate (mmol/L)         | 21 (18-24)               | 21 (18-24)              | 0.23           |
| Maximum lactate (mmol/L)             | 2.3 (1.7-3.4)            | 2.2 (1.6-3.3)           | 0.34           |

|                                  |                  |                  |      |
|----------------------------------|------------------|------------------|------|
| Maximum INR                      | 1.4 (1.3-1.9)    | 1.5 (1.3-1.9)    | 0.20 |
| Maximum PTT (sec)                | 38.6 (30.5-57.4) | 38.7 (30.5-57.9) | 0.80 |
| Interventions                    |                  |                  |      |
| Mechanical ventilation, n (%)    | 3186 (76.1)      | 1339 (74.6)      | 0.22 |
| Vasopressors, n (%)              | 2266 (54.1)      | 948 (52.8)       | 0.36 |
| RRT initiation, n (%)            | 171 (4.1)        | 86 (4.8)         | 0.24 |
| Diuretics, n (%)                 | 2218 (53.0)      | 962 (53.6)       | 0.69 |
| Daily fluid infusion (mL)        | 3097 (1932-4558) | 3019 (1921-4596) | 0.66 |
| AKI stage by SCr criteria, n (%) |                  |                  | 0.63 |
| 1                                | 1229 (29.3)      | 556 (31.0)       |      |
| 2                                | 282 (6.7)        | 123 (6.9)        |      |
| 3                                | 332 (7.9)        | 140 (7.8)        |      |
| AKI stage by UO criteria, n (%)  |                  |                  | 0.11 |
| 1                                | 626 (14.9)       | 281 (15.6)       |      |
| 2                                | 2108 (50.3)      | 854 (47.6)       |      |
| 3                                | 906 (21.6)       | 433 (24.1)       |      |
| Persistent AKI                   | 2644 (63.1)      | 1161 (64.6)      | 0.28 |

ICU, intensive care unit; MICU, medical intensive care unit; SICU, surgical intensive care unit; TSICU, trauma surgical intensive care unit; CCU, coronary care unit; CSRU, cardiac surgery recovery unit; AIDS, acquired immune deficiency syndrome; MAP, mean arterial pressure; WBC, white blood cell; PaO<sub>2</sub>, partial pressure of oxygen; PaCO<sub>2</sub>, partial pressure of carbon dioxide; INR, International normalized ratio; PTT, partial thromboplastin time; RRT, renal replacement therapy; AKI, acute kidney injury; SCr, serum creatinine; UO, urine output.

Continuous variables were presented as median (interquartile range) and categorical variables were presented as n (%).

**Figure S1.** Risk calculator for the persistence of SA-AKI.

| Risk Calculator for the persistence of SA-AKI |                                   |        |                                         |                                         |
|-----------------------------------------------|-----------------------------------|--------|-----------------------------------------|-----------------------------------------|
| <b>Age</b>                                    | <input type="text" value="42"/>   | year   | <b>Diabetes mellitus</b>                | <b>Congestive heart failure</b>         |
|                                               |                                   |        | <input type="radio"/> yes               | <input checked="" type="radio"/> yes    |
|                                               |                                   |        | <input checked="" type="radio"/> no     | <input type="radio"/> no                |
| <b>PaO2</b>                                   | <input type="text" value="75"/>   | mmHg   | <b>Chronic kidney disease</b>           | <b>Mechanical ventilation</b>           |
|                                               |                                   |        | <input type="radio"/> yes               | <input checked="" type="radio"/> yes    |
|                                               |                                   |        | <input checked="" type="radio"/> no     | <input type="radio"/> no                |
| <b>PaCO2</b>                                  | <input type="text" value="46"/>   | mmHg   | <b>RRT induction</b>                    |                                         |
|                                               |                                   |        | <input type="radio"/> yes               |                                         |
|                                               |                                   |        | <input checked="" type="radio"/> no     |                                         |
| <b>Anion gap</b>                              | <input type="text" value="13"/>   | mmol/L | <b>UO stage</b>                         | <b>SCr stage</b>                        |
|                                               |                                   |        | <input type="radio"/> no                | <input type="radio"/> no                |
|                                               |                                   |        | <input type="radio"/> stage1            | <input checked="" type="radio"/> stage1 |
|                                               |                                   |        | <input checked="" type="radio"/> stage2 | <input type="radio"/> stage2            |
|                                               |                                   |        | <input type="radio"/> stage3            | <input type="radio"/> stage3            |
| <b>Lactate</b>                                | <input type="text" value="2.7"/>  | mmol/L |                                         |                                         |
|                                               |                                   |        |                                         |                                         |
| <b>INR</b>                                    | <input type="text" value="1.2"/>  |        |                                         |                                         |
|                                               |                                   |        |                                         |                                         |
| <b>Ptt</b>                                    | <input type="text" value="22.8"/> | sec    |                                         |                                         |
|                                               |                                   |        |                                         |                                         |
| <b>Run</b>                                    |                                   |        | <b>Estimated risk of persistent AKI</b> | 0.71469 high risk                       |
